# Supplementary material for: Polychaete Annelid Biomass Size Spectra: The Effects of Hypoxia Stress
Source: Hindawi journal article supplement (doi:10.1155/2015/983521), 2015-01-01
Supplement: f1 [file 983521.f1.pdf]

list of Gulf of Mexico hypoxic zone.

| Family          | Species                           | I-A | I-B | I-C | II-A | II-B |
|-----------------|-----------------------------------|-----|-----|-----|------|------|
| Ampharetidae    | <i>Ampharete sp.A</i>             | 0   | 1   | 0   | 0    | 5    |
| Ampharetidae    | <i>Melinna sp.1</i>               | 0   | 0   | 0   | 0    | 0    |
| Ampharetidae    | <i>Melinna maculata</i>           | 0   | 0   | 0   | 0    | 0    |
| Amphinomidae    | <i>sp.2</i>                       | 0   | 0   | 0   | 0    | 0    |
| Amphinomidae    | <i>Eurythoe sp.1</i>              | 0   | 0   | 0   | 0    | 0    |
| Aphroditidae    | <i>Aphroditid sp.1</i>            | 0   | 0   | 0   | 0    | 0    |
| Aphroditidae    | <i>Aphroditid sp.2</i>            | 0   | 0   | 0   | 0    | 0    |
| Capitellidae    | <i>Decamastus sp.1</i>            | 0   | 0   | 0   | 0    | 0    |
| Capitellidae    | <i>Capitellidae Genus 1</i>       | 0   | 0   | 1   | 0    | 0    |
| Capitellidae    | <i>Heteromastus sp.1</i>          | 0   | 0   | 1   | 0    | 0    |
| Capitellidae    | <i>Mediomastus californiensis</i> | 2   | 11  | 81  | 1    | 8    |
| Capitellidae    | <i>Notomastus daueri</i>          | 0   | 2   | 12  | 3    | 1    |
| Capitellidae    | <i>Capitellid sp.1</i>            | 0   | 0   | 0   | 0    | 0    |
| Capitellidae    | <i>Notomastus americanus</i>      | 0   | 0   | 0   | 0    | 0    |
| Chaetopteridae  | <i>Spiochaetopterus costarum</i>  | 0   | 1   | 0   | 0    | 0    |
| Cirratulidae    | <i>Chaetozone sp.1</i>            | 0   | 0   | 0   | 0    | 0    |
| Cirratulidae    | <i>Chaetozone sp.2</i>            | 0   | 0   | 0   | 0    | 0    |
| Cirratulidae    | <i>Chaetozone sp.D</i>            | 0   | 0   | 0   | 0    | 0    |
| Cirratulidae    | <i>Cirriiformia sp.1</i>          | 0   | 0   | 0   | 0    | 0    |
| Cirratulidae    | <i>Cirratulid sp.1</i>            | 0   | 0   | 0   | 0    | 0    |
| Cirratulidae    | <i>Cirratulid sp.2</i>            | 0   | 0   | 0   | 0    | 0    |
| Cirratulidae    | <i>Cirratulid sp.3</i>            | 0   | 0   | 0   | 0    | 0    |
| Cirratulidae    | <i>Cirratulid sp.4</i>            | 0   | 0   | 0   | 0    | 0    |
| Cirratulidae    | <i>Cirratulid sp.5</i>            | 0   | 0   | 0   | 0    | 0    |
| Cirratulidae    | <i>Tharyx annulosus</i>           | 0   | 0   | 1   | 0    | 2    |
| Cirratulidae    | <i>Cauleriella sp.1</i>           | 0   | 0   | 0   | 0    | 0    |
| Cirratulidae    | <i>sp.6</i>                       | 0   | 0   | 0   | 0    | 0    |
| Cossuridae      | <i>Cossura soyeri</i>             | 0   | 8   | 13  | 3    | 3    |
| Cossuridae      | <i>Cossurid sp.1</i>              | 0   | 0   | 0   | 0    | 0    |
| Cossuridae      | <i>Cossura delta</i>              | 0   | 0   | 0   | 0    | 0    |
| Dorvilleidae    | <i>Schistomeringos rudolphii</i>  | 0   | 0   | 0   | 0    | 0    |
| Eulepethidae    | <i>Grubeulepis mexicana</i>       | 0   | 0   | 0   | 0    | 0    |
| Eulepethidae    | <i>sp.1</i>                       | 0   | 0   | 0   | 0    | 0    |
| Eunicidae       | <i>Marphysa sp.1</i>              | 0   | 0   | 0   | 0    | 0    |
| FAMILY X        | <i>sp.1</i>                       | 0   | 0   | 0   | 0    | 0    |
| Flabelligeridae | <i>Brada villosa</i>              | 0   | 0   | 4   | 0    | 1    |
| Flabelligeridae | <i>Diplocirrus sp.A</i>           | 0   | 0   | 0   | 0    | 0    |
| Glyceridae      | <i>Glycera americana</i>          | 0   | 0   | 0   | 0    | 0    |
| Glyceridae      | <i>Glycera sp.C</i>               | 0   | 1   | 0   | 0    | 1    |
| Glyceridae      | <i>Glycerid sp.1</i>              | 0   | 0   | 0   | 0    | 0    |
| Goniadidae      | <i>Glycinde solitaria</i>         | 0   | 0   | 0   | 0    | 0    |
| Goniadidae      | <i>Goniada teres</i>              | 0   | 0   | 0   | 0    | 0    |
| Goniadidae      | <i>Goniadid sp.1</i>              | 0   | 0   | 0   | 0    | 0    |
| Goniadidae      | <i>Goniadid sp.2</i>              | 0   | 0   | 0   | 0    | 0    |
| Goniadidae      | <i>Goniadid sp.3</i>              | 0   | 0   | 0   | 0    | 0    |
| Goniadidae      | <i>Ophioglycera sp.1</i>          | 0   | 0   | 0   | 0    | 0    |
| Goniadidae      | <i>sp.4</i>                       | 0   | 0   | 0   | 0    | 0    |
| Hesionidae      | <i>Gyptis brevipalpa</i>          | 0   | 0   | 0   | 0    | 0    |
| Hesionidae      | <i>Hesionid sp.1</i>              | 0   | 0   | 0   | 0    | 0    |

|               |                                 |   |   |    |   |   |
|---------------|---------------------------------|---|---|----|---|---|
| Hesionidae    | <i>Ophiodromus sp.1</i>         | 0 | 0 | 0  | 0 | 0 |
| Lumbrineridae | <i>Lumbrineris cruzensis</i>    | 0 | 0 | 0  | 0 | 0 |
| Lumbrineridae | <i>Lumbrineris ernesti</i>      | 0 | 0 | 0  | 0 | 0 |
| Lumbrineridae | <i>Lumbrineris sp.B</i>         | 0 | 0 | 0  | 0 | 0 |
| Lumbrineridae | <i>Lumbrineris verrilli</i>     | 0 | 0 | 2  | 0 | 0 |
| Lumbrineridae | <i>Ninoe sp.B</i>               | 0 | 1 | 1  | 0 | 0 |
| Lumbrineridae | <i>Lumbrinerid sp.1</i>         | 0 | 0 | 0  | 0 | 0 |
| Lumbrineridae | <i>Lumbrinerid sp.2</i>         | 0 | 0 | 0  | 0 | 0 |
| Lumbrineridae | <i>sp.3</i>                     | 0 | 0 | 0  | 0 | 0 |
| Lumbrineridae | <i>sp.4</i>                     | 0 | 0 | 0  | 0 | 0 |
| Magelonidae   | <i>Magelona sp.H</i>            | 0 | 0 | 13 | 0 | 4 |
| Magelonidae   | <i>Magelona sp.I</i>            | 0 | 0 | 0  | 0 | 0 |
| Maldanidae    | <i>Sabaco elongatus</i>         | 0 | 0 | 0  | 0 | 6 |
| Maldanidae    | <i>Clymenella torquata</i>      | 0 | 0 | 0  | 0 | 0 |
| Maldanidae    | <i>Maldanid sp.1</i>            | 0 | 2 | 1  | 0 | 0 |
| Maldanidae    | <i>Maldanid sp.2</i>            | 0 | 0 | 0  | 0 | 0 |
| Maldanidae    | <i>sp.3</i>                     | 0 | 0 | 0  | 0 | 0 |
| Nephtyidae    | <i>Aglaophamus sp.1</i>         | 0 | 0 | 0  | 0 | 0 |
| Nephtyidae    | <i>Aglaophamus sp.2</i>         | 0 | 0 | 0  | 0 | 0 |
| Nephtyidae    | <i>Aglaophamus verrilli</i>     | 0 | 1 | 0  | 0 | 0 |
| Nephtyidae    | <i>Nephtys incisa</i>           | 8 | 0 | 7  | 6 | 1 |
| Nephtyidae    | <i>Nephtyid sp.1</i>            | 0 | 0 | 0  | 0 | 0 |
| Nereidae      | <i>Alitta succinea</i>          | 0 | 0 | 0  | 0 | 2 |
| Nereidae      | <i>Nereis sp.1</i>              | 0 | 0 | 0  | 0 | 0 |
| Nereidae      | <i>Nereid sp.1</i>              | 0 | 0 | 0  | 0 | 0 |
| Nereidae      | <i>Nereid sp.2</i>              | 0 | 0 | 0  | 0 | 0 |
| Nereidae      | <i>Nereid sp.3</i>              | 0 | 0 | 0  | 0 | 0 |
| Nereidae      | <i>Nereis micromma</i>          | 0 | 0 | 0  | 0 | 0 |
| Nereidae      | <i>Nereis sp.2</i>              | 0 | 0 | 0  | 0 | 0 |
| Nereidae      | <i>heteronereid</i>             | 0 | 0 | 0  | 0 | 0 |
| Nereidae      | <i>sp.4</i>                     | 0 | 0 | 0  | 0 | 0 |
| Onuphidae     | <i>Diopatra cuprea</i>          | 1 | 1 | 0  | 0 | 0 |
| Onuphidae     | <i>Diopatra sp.1</i>            | 3 | 9 | 2  | 0 | 0 |
| Onuphidae     | <i>Kinbergonuphis sp.1</i>      | 0 | 0 | 0  | 0 | 0 |
| Onuphidae     | <i>Mooreonuphis sp.1</i>        | 1 | 0 | 0  | 0 | 0 |
| Onuphidae     | <i>Onuphid sp.1</i>             | 0 | 0 | 0  | 0 | 0 |
| Onuphidae     | <i>Diopatra sp.2</i>            | 0 | 0 | 0  | 0 | 0 |
| Onuphidae     | <i>Kinbergonuphis sp.B</i>      | 0 | 0 | 0  | 0 | 0 |
| Opheliidae    | <i>Ophelina sp.1</i>            | 0 | 1 | 0  | 0 | 1 |
| Opheliidae    | <i>Armandia maculata</i>        | 0 | 0 | 0  | 0 | 0 |
| Opheliidae    | <i>Ophelina sp.2</i>            | 0 | 0 | 0  | 0 | 0 |
| Opheliidae    | <i>Armandia agilis</i>          | 0 | 0 | 0  | 0 | 0 |
| Opheliidae    | <i>Ophelia sp.1</i>             | 0 | 0 | 0  | 0 | 0 |
| Oweniidae     | <i>Myriowenia sp.A</i>          | 0 | 0 | 0  | 0 | 0 |
| Oweniidae     | <i>Owenia sp.A</i>              | 0 | 0 | 0  | 0 | 0 |
| Paraonidae    | <i>Aricidea taylora</i>         | 0 | 0 | 0  | 0 | 0 |
| Paraonidae    | <i>Cirrophorus americanus</i>   | 0 | 0 | 0  | 0 | 0 |
| Paraonidae    | <i>Cirrophorus forticirratu</i> | 0 | 0 | 0  | 0 | 0 |
| Paraonidae    | <i>Levinsenia gracilis</i>      | 0 | 0 | 1  | 0 | 0 |
| Paraonidae    | <i>Levinsenia sp.1</i>          | 0 | 0 | 0  | 0 | 0 |
| Paraonidae    | <i>Paraonid sp.1</i>            | 0 | 0 | 0  | 0 | 0 |
| Paraonidae    | <i>Paraonid sp.2</i>            | 0 | 0 | 0  | 0 | 0 |

|                  |                                 |    |    |    |    |   |
|------------------|---------------------------------|----|----|----|----|---|
| Paraonidae       | <i>Paraonid sp.3</i>            | 0  | 0  | 0  | 0  | 0 |
| Paraonidae       | <i>Paraonid sp.4</i>            | 0  | 0  | 0  | 0  | 0 |
| Paraonidae       | <i>Cirrophorus sp.1</i>         | 0  | 0  | 0  | 0  | 0 |
| Paraonidae       | <i>Aricidea suecica</i>         | 0  | 0  | 0  | 0  | 0 |
| Paraonidae       | <i>Aricidea (Acmira)sp.2</i>    | 0  | 0  | 0  | 0  | 0 |
| Paraonidae       | <i>Cirrophorus sp.3</i>         | 0  | 0  | 0  | 0  | 0 |
| Paraonidae       | <i>Aricidea (Acmira) sp.1</i>   | 21 | 19 | 29 | 11 | 4 |
| Pectinariidae    | <i>Pectinariid sp.1</i>         | 0  | 0  | 0  | 0  | 0 |
| Phyllodocidae    | <i>Anatides sp.1</i>            | 0  | 0  | 0  | 0  | 0 |
| Phyllodocidae    | <i>Genetyllis sp.1</i>          | 0  | 0  | 0  | 0  | 0 |
| Phyllodocidae    | <i>Phyllodoce arenae</i>        | 0  | 0  | 1  | 0  | 0 |
| Phyllodocidae    | <i>Phyllodocid sp.1</i>         | 0  | 0  | 0  | 0  | 0 |
| Pilargidae       | <i>Ancistrosyllis papillosa</i> | 0  | 0  | 0  | 0  | 0 |
| Pilargidae       | <i>Sigambra tentaculata</i>     | 0  | 1  | 9  | 3  | 1 |
| Pilargidae       | <i>Ancistrosyllis jonesi</i>    | 0  | 0  | 0  | 0  | 0 |
| Poecilochaetidae | <i>Poecilochaetus johnsoni</i>  | 0  | 0  | 0  | 0  | 0 |
| Polynoidae       | <i>Malmgreniella sp.B</i>       | 0  | 0  | 0  | 0  | 0 |
| Polynoidae       | <i>Polynoid sp.1</i>            | 0  | 0  | 0  | 0  | 0 |
| Polynoidae       | <i>Polynoid sp.2</i>            | 0  | 0  | 0  | 0  | 0 |
| Polynoidae       | <i>sp.3</i>                     | 0  | 0  | 0  | 0  | 0 |
| Polynoidae       | <i>Lepidasthenia sp.1</i>       | 0  | 0  | 0  | 0  | 0 |
| Polynoidae       | <i>sp.4</i>                     | 0  | 0  | 0  | 0  | 0 |
| Sabellidae       | <i>Megalomma bioculatum</i>     | 0  | 0  | 0  | 0  | 0 |
| Sabellidae       | <i>Sabellid sp.1</i>            | 0  | 0  | 0  | 0  | 0 |
| Sigalionidae     | <i>Sthenelais sp.1</i>          | 2  | 0  | 0  | 0  | 1 |
| Spionidae        | <i>Malacoceros sp.1</i>         | 0  | 0  | 0  | 0  | 0 |
| Spionidae        | <i>Paraprionospio pinnata</i>   | 21 | 6  | 22 | 70 | 9 |
| Spionidae        | <i>Polydora aggregata</i>       | 0  | 1  | 0  | 0  | 0 |
| Spionidae        | <i>Polydora ligni</i>           | 0  | 1  | 0  | 0  | 0 |
| Spionidae        | <i>Prionospio cristata</i>      | 0  | 0  | 7  | 0  | 1 |
| Spionidae        | <i>Prionospio sp.1</i>          | 1  | 0  | 0  | 0  | 0 |
| Spionidae        | <i>Prionospio sp.2</i>          | 0  | 0  | 0  | 0  | 0 |
| Spionidae        | <i>Spionid sp.1</i>             | 0  | 0  | 0  | 0  | 0 |
| Spionidae        | <i>Spiophanes missionensis</i>  | 0  | 0  | 0  | 0  | 0 |
| Spionidae        | <i>Aonides sp.1</i>             | 0  | 0  | 0  | 0  | 0 |
| Spionidae        | <i>Spio sp.1</i>                | 0  | 0  | 0  | 0  | 0 |
| Spionidae        | <i>sp.2</i>                     | 0  | 0  | 0  | 0  | 0 |
| Spionidae        | <i>Microspio sp.1</i>           | 0  | 0  | 0  | 0  | 0 |
| Spionidae        | <i>Polydora sp.1</i>            | 0  | 0  | 0  | 0  | 0 |
| Spionidae        | <i>Malacoceros vanderhorsti</i> | 0  | 0  | 0  | 0  | 0 |
| Spionidae        | <i>Microspio sp.2</i>           | 0  | 0  | 0  | 0  | 0 |
| Spionidae        | <i>Microspio sp.3</i>           | 0  | 0  | 0  | 0  | 0 |
| Sternaspidae     | <i>Sternaspis scutata</i>       | 0  | 0  | 0  | 0  | 0 |
| Terebellidae     | <i>Pista sp.1</i>               | 0  | 0  | 0  | 0  | 0 |















---

| XV-AB5 | XV-B |
|--------|------|
| 0      | 3    |
| 0      | 0    |
| 0      | 3    |
| 5      | 0    |
| 0      | 7    |
| 0      | 0    |
| 0      | 0    |
| 0      | 0    |
| 0      | 0    |
| 0      | 0    |
| 257    | 360  |
| 6      | 9    |
| 0      | 0    |
| 0      | 9    |
| 0      | 0    |
| 0      | 1    |
| 0      | 0    |
| 6      | 3    |
| 0      | 0    |
| 0      | 0    |
| 0      | 0    |
| 0      | 1    |
| 0      | 0    |
| 43     | 80   |
| 0      | 11   |
| 0      | 1    |
| 64     | 17   |
| 0      | 0    |
| 22     | 8    |
| 0      | 1    |
| 0      | 0    |
| 0      | 1    |
| 0      | 0    |
| 0      | 0    |
| 0      | 2    |
| 0      | 6    |
| 0      | 0    |
| 0      | 0    |
| 3      | 0    |
| 0      | 0    |
| 0      | 0    |
| 0      | 0    |
| 0      | 0    |
| 0      | 6    |
| 0      | 1    |
| 0      | 0    |
| 0      | 0    |

|     |    |
|-----|----|
| 13  | 1  |
| 0   | 0  |
| 0   | 0  |
| 0   | 0  |
| 0   | 4  |
| 0   | 0  |
| 0   | 0  |
| 0   | 0  |
| 0   | 3  |
| 0   | 1  |
| 106 | 68 |
| 1   | 4  |
| 1   | 14 |
| 2   | 4  |
| 0   | 1  |
| 0   | 0  |
| 0   | 10 |
| 0   | 0  |
| 0   | 0  |
| 0   | 0  |
| 6   | 0  |
| 0   | 0  |
| 0   | 0  |
| 0   | 0  |
| 0   | 0  |
| 0   | 0  |
| 0   | 0  |
| 92  | 52 |
| 0   | 1  |
| 0   | 0  |
| 0   | 1  |
| 0   | 0  |
| 0   | 0  |
| 0   | 0  |
| 0   | 0  |
| 0   | 0  |
| 0   | 4  |
| 0   | 1  |
| 0   | 0  |
| 0   | 0  |
| 0   | 0  |
| 2   | 0  |
| 0   | 1  |
| 0   | 0  |
| 0   | 0  |
| 0   | 1  |
| 0   | 0  |
| 0   | 0  |
| 0   | 64 |
| 0   | 0  |
| 0   | 0  |
| 0   | 0  |

|    |    |
|----|----|
| 0  | 0  |
| 0  | 0  |
| 0  | 0  |
| 1  | 28 |
| 2  | 0  |
| 0  | 21 |
| 35 | 62 |
| 0  | 0  |
| 0  | 0  |
| 0  | 0  |
| 0  | 0  |
| 0  | 0  |
| 0  | 0  |
| 46 | 11 |
| 1  | 3  |
| 0  | 15 |
| 0  | 0  |
| 0  | 0  |
| 0  | 0  |
| 1  | 0  |
| 2  | 0  |
| 1  | 0  |
| 1  | 6  |
| 0  | 0  |
| 17 | 19 |
| 0  | 0  |
| 89 | 14 |
| 0  | 0  |
| 0  | 0  |
| 1  | 31 |
| 0  | 0  |
| 0  | 0  |
| 31 | 12 |
| 0  | 0  |
| 0  | 0  |
| 1  | 0  |
| 1  | 0  |
| 4  | 4  |
| 1  | 0  |
| 0  | 1  |
| 0  | 1  |
| 0  | 6  |
| 0  | 0  |
| 0  | 0  |

---
